# Supplementary material for: Recombinant BCG expressing the LTAK63 adjuvant induces increased early and long-term immune responses against Mycobacteria
Source: PubMed Central journal article supplement — Hum Vaccin Immunother. 2019 Oct 31;16(3):673–83. doi: 10.1080/21645515.2019.1669414 (PMC7227645; doi:10.1080/21645515.2019.1669414), 2019-10-31
Supplement: khvi-16-03-1669414-s001.pdf [file khvi-16-03-1669414-s001.pdf]

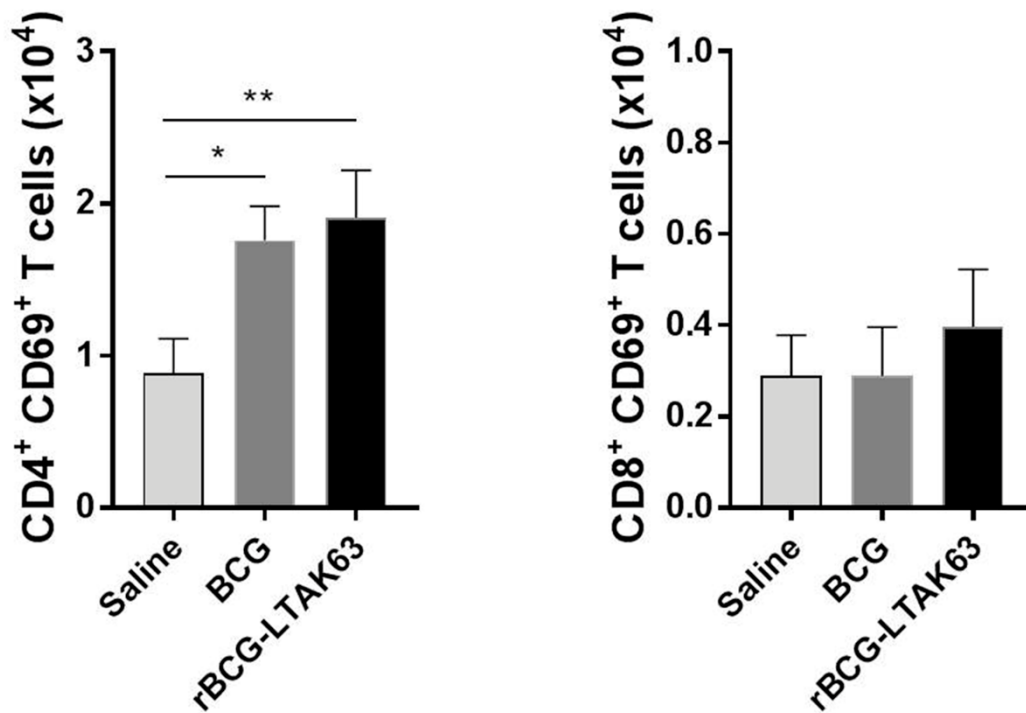

**Supplemental Figure 1. BCG and rBCG-LTAK63 induce CD4<sup>+</sup> CD69<sup>+</sup> T cells at 7 days after intraperitoneal immunization.** Immunophenotyping of T lymphocytes from the peritoneal fluid of BALB/c mice 7 days after i.p. immunization with BCG or rBCG-LTAK63 ( $1 \times 10^6$  CFU). The control group received Saline. The results represent one of two independent experiments with similar results ( $n= 4$  animals per group). Statistical significance was determined by one-way ANOVA. Significant differences were observed for indicated groups (\*  $P < 0.05$ ; \*\*  $P < 0.01$ ).
